# Supplementary material
Source: PubMed Central journal article supplement (PMC1838575)
Supplement: neo0903_0181SD1.pdf [file neo0903_0181SD1.pdf]

**Table W1.** Supplementary PET Clinical-Pathological Data and *ARHI* mRNA Expression.

| Sample | Tumor Type | Diagnosis | Follow-up (months) | Progression* | TTP* (months) | Outcome | Ki67 (%) | <i>ARHI</i> $\Delta\Delta Ct^\dagger$ |
|--------|------------|-----------|--------------------|--------------|---------------|---------|----------|---------------------------------------|
| 1      | NF         | WDEC      | 58                 | Yes          | 52            | DOD     | 5        | 12.24                                 |
| 2      | NF         | PDEC      | 12                 | Yes          | 6             | DOD     | 30       | 6.61                                  |
| 3      | NF         | WDEC      | 73                 | Yes          | 36            | AWD     | 10       | 7.94                                  |
| 4      | NF         | WDET      | 88                 | No           |               | AW      | 2        | 10.87                                 |
| 5      | NF         | WDEC      | 49                 | Yes          | 22            | AWD     | 8        | 4.49                                  |
| 6      | F          | WDET      | 50                 | No           |               | AW      | 2        | 10.31                                 |
| 7      | F          | WDEC      | 25                 | Yes          | 12            | DOD     | 17       | 10.10                                 |
| 8      | NF         | WDET      | 89                 | No           |               | AW      | 2        | 11.33                                 |
| 9      | NF         | WDEC      | 71                 | Yes          | 14            | DOD     | 7        | 4.09                                  |
| 10     | NF         | WDET      | 48                 | No           |               | AW      | 2        | 10.53                                 |
| 11     | NF         | WDEC      | 31                 | Yes          | 8             | AWD     | 5        | 2.74                                  |
| 12     | NF         | WDEC      | 58                 | No           |               | AW      | 3        | 13.57                                 |
| 13     | F          | WDET      | 48                 | No           |               | AW      | 1        | 10.65                                 |
| 14     | NF         | WDEC      | 32                 | Yes          | 25            | AWD     | 3        | 11.40                                 |
| 15     | NF         | PDEC      | 6                  | Yes          | 6             | DOD     | 40       | 6.10                                  |
| 16     | NF         | WDEC      | 38                 | No           |               | AW      | 2        | 10.36                                 |
| 17     | NF         | WDEC      | 91                 | Yes          | 36            | DOD     | 2        | 11.47                                 |
| 18     | NF         | WDEC      | 37                 | No           |               | AW      | 5        | 11.51                                 |
| 19     | F          | WDET      | 47                 | No           |               | AW      | 1        | 10.50                                 |
| 20     | NF         | WDET      | 76                 | No           |               | AW      | 1        | 10.71                                 |
| 21     | NF         | WDET      | 66                 | No           |               | DOC     | 2        | 10.83                                 |
| 22     | F          | WDEC      | 45                 | No           |               | AW      | 3        | 9.13                                  |
| 23     | NF         | WDET      | 25                 | No           |               | AW      | 2        | 9.37                                  |
| 24     | NF         | WDET      | 22                 | No           |               | AW      | 2        | 8.53                                  |
| 25     | NF         | WDET      | 30                 | No           |               | AW      | 1        | 10.24                                 |
| 26     | NF         | WDEC      | 38                 | No           |               | AW      | 2        | 11.48                                 |
| 27     | NF         | WDET      | 43                 | No           |               | AW      | 2        | 13.22                                 |
| 28     | NF         | WDEC      | na                 | na           | na            | na      | 2        | 7.09                                  |
| 29     | NF         | WDEC      | 45                 | No           |               | AW      | 5        | 12.56                                 |
| 30     | NF         | WDET      | 162                | No           |               | AW      | 1        | 11.32                                 |
| 31     | NF         | WDEC      | 32                 | No           |               | AW      | 2        | 3.91                                  |
| 32     | NF         | WDEC      | 68                 | Yes          | 24            | DOD     | 17       | 11.13                                 |
| 33     | NF         | WDEC      | 76                 | No           |               | AW      | 2        | 5.82                                  |
| 34     | NF         | WDET      | 56                 | No           |               | AW      | 2        | 12.65                                 |
| 35     | NF         | PDEC      | 13                 | Yes          | 4             | DOD     | 25       | 4.77                                  |
| 36     | NF         | WDEC      | 4                  | Yes          | 2             | DOD     | 1        | 11.61                                 |
| 37     | F          | WDET      | 55                 | No           |               | AW      | 2        | 10.84                                 |
| 38     | F          | WDET      | 200                | No           |               | AW      | 2        | 11.83                                 |
| 39     | NF         | WDEC      | 55                 | Yes          | 36            | DOD     | 5        | 9.45                                  |
| 40     | NF         | WDET      | 60                 | No           |               | AW      | 1        | 3.01                                  |
| 41     | NF         | WDEC      | na                 | na           | na            | na      | 2        | 3.27                                  |
| 42     | NF         | PDEC      | 13                 | Yes          | 7             | DOD     | 40       | 0.00                                  |
| 43     | NF         | WDEC      | 55                 | Yes          | 24            | DOD     | 2        | 5.38                                  |
| 44     | NF         | WDET      | 164                | No           |               | AW      | 5        | 13.32                                 |
| 45     | NF         | WDEC      | 3                  | No           |               | DOC     | 3        | 5.10                                  |
| 46     | NF         | WDET      | 135                | No           |               | AW      | 1        | 11.06                                 |
| 47     | F          | WDET      | 35                 | No           |               | AW      | 2        | 11.54                                 |
| 48     | NF         | WDET      | 22                 | No           |               | AW      | 2        | 10.66                                 |
| 49     | NF         | WDEC      | 53                 | No           |               | AW      | 2        | 6.52                                  |
| 50     | NF         | WDEC      | 104                | Yes          | 104           | AW      | 3        | 12.28                                 |
| 51     | NF         | WDEC      | 91                 | Yes          | 49            | AWD     | 2        | 13.68                                 |
| 52     | NF         | WDET      | na                 | na           | na            | na      | 1        | 8.29                                  |

NF, nonfunctioning; F, functioning; WDET, well-differentiated endocrine tumor; WDEC, well-differentiated endocrine carcinoma; PDEC: poorly differentiated endocrine carcinoma; na, not available; AW, alive and well; AWD, alive with disease; DOD, dead of disease; DOC, dead of other cause.

\*Time to progression calculated as the interval from surgery to disease progression.

$\dagger \Delta\Delta Ct_{ARHI} = |\Delta Ct_{ARHI} - \max(\Delta Ct_{ARHI})|$ , where  $Ct_{ARHI}$  and  $Ct_{\beta\text{-actin}}$  represent the comparative threshold cycle for *ARHI* and  $\beta$ -actin, respectively.

**Table W2.** *ARHI* mRNA Expression in Normal Pancreatic Bulk Tissues and Islets.

| Sample* | <i>ARHI</i> $\Delta\Delta Ct^\dagger$ |
|---------|---------------------------------------|
| N1      | 11.06                                 |
| N2      | 9.07                                  |
| N3      | 9.39                                  |
| N4      | 9.41                                  |
| N5      | 9.47                                  |
| N6      | 9.58                                  |
| N7      | 9.69                                  |
| N8      | 9.81                                  |
| N9      | 10.11                                 |
| N10     | 10.26                                 |
| N11     | 10.44                                 |
| N12     | 11.81                                 |
| I1      | 8.09                                  |
| I2      | 12.01                                 |
| I3      | 8.14                                  |
| I4      | 8.71                                  |

\*N1 to N12: normal pancreatic bulk tissues; I1 to I4: normal pancreatic islets.  
 $\dagger \Delta\Delta Ct_{ARHI} = \left| \left| \Delta Ct_{ARHI} - \max(\Delta Ct_{ARHI}) \right| \right|$ , where  $Ct_{ARHI}$  and  $Ct_{\beta\text{-actin}}$  represent the comparative threshold cycle for *ARHI* and  $\beta$ -actin, respectively.

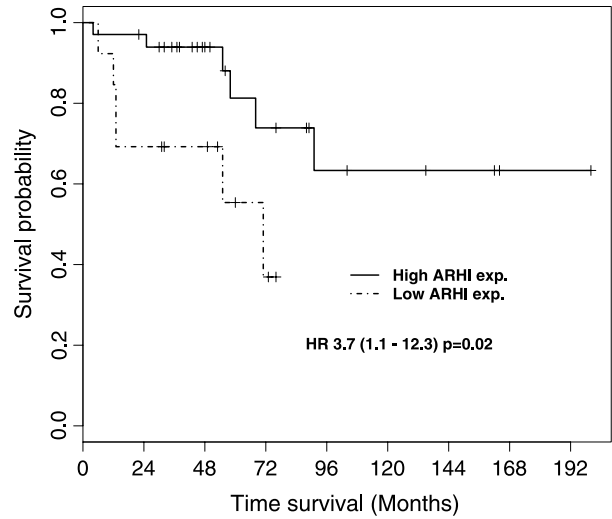

**Figure W1.**

**Table W3.** *ARHI* and Ki67 Expression in Relation to Tumor Category and Outcome.

|      | No. of patients* | Mean Ki67 (%) | Mean <i>ARHI</i> $\Delta\Delta Ct^\dagger$ | Outcome (DOD) <sup>‡</sup> |
|------|------------------|---------------|--------------------------------------------|----------------------------|
| WDET | 20               | 2             | 10.62                                      | 0/20                       |
| WDEC | 23               | 5             | 9.25                                       | 8/23                       |
| PDEC | 4                | 34            | 4.37                                       | 4/4                        |

\*Only patients with survival data available are included.  
 $\dagger \Delta\Delta Ct_{ARHI} = \left| \left| \Delta Ct_{ARHI} - \max(\Delta Ct_{ARHI}) \right| \right|$ , where  $Ct_{ARHI}$  and  $Ct_{\beta\text{-actin}}$  represent the comparative threshold cycle for *ARHI* and  $\beta$ -actin, respectively.  
 $\ddagger$ Outcome: number of patients dead of disease (DOD).

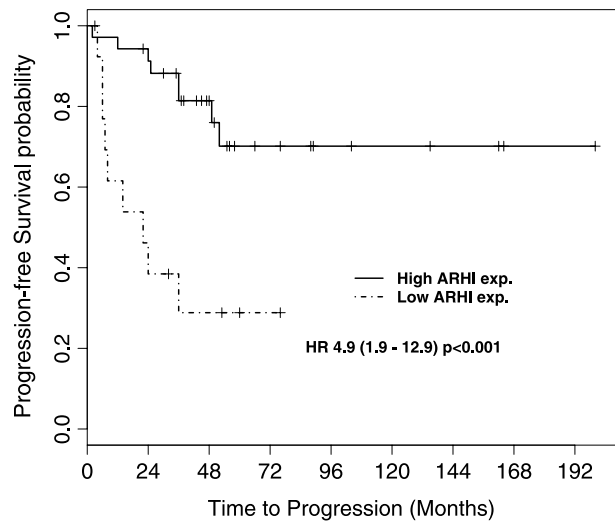

**Figure W2.**
